# Supplementary material
Source: Springer Nature journal article supplement (https://www.springermedizin.de/resource/supplementary/13034_2012_205_MOESM1_ESM.pdf/9652538)

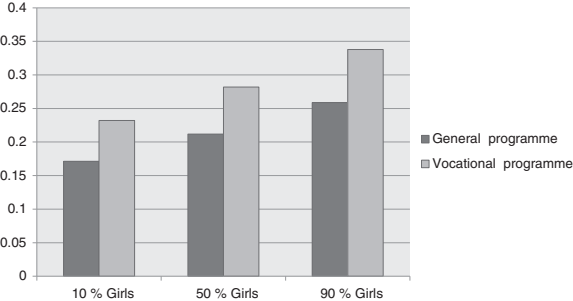

Supplement: MOESM1 [file 9652538]
